# Supplementary material for: ZIF-8-based vs. ZIF-8-derived Au and Pd nanoparticles as efficient catalysts for the Ullmann homocoupling reaction
Source: Royal Society of Chemistry journal article supplement (doi:10.1039/d0qi00831a), 2020-01-01
Supplement: d0qi00831a1.pdf [file d0qi00831a1.pdf]

## Electronic Supplementary Information

### ZIF-8-Based vs. ZIF-8-Derived Au and Pd Nanoparticles as Efficient Nanocatalysts for the Ullmann Homocoupling Reaction

Wenjuan Wang,<sup>a,b</sup> Shuang Chen,<sup>c</sup> Eduardo Guisasola Cal,<sup>d</sup> Marta Martínez Moro,<sup>d</sup> Sergio Moya,<sup>d</sup> Emerson Coy,<sup>e</sup> Changlong Wang,<sup>a</sup> Jean-René Hamon,<sup>b</sup> and Didier Astruc<sup>a,\*</sup>

<sup>a</sup> ISM, UMR CNRS 5255, Université de Bordeaux, Talence 33405 Cedex, France. E-mail: [didier.astruc@u-bordeaux.fr](mailto:didier.astruc@u-bordeaux.fr)

<sup>b</sup> Institut des Sciences Chimiques, UMR CNRS 6226, Université de Rennes 1, 35042 Rennes Cedex, France.

<sup>c</sup> Department of Chemistry and Center for Atomic Engineering of Advanced Materials, Anhui University, Hefei, Anhui 230601, China.

<sup>d</sup> Soft Matter Nanotechnology Lab, CIC biomaGUNE, Paseo Miramón 182, 20014 Donostia-San Sebastián, Gipuzkoa, Spain.

NanoBioMedical Centre, Adam Mickiewicz University in Poznań, Wszechnicy Piastowskiej 3, 61-614 Poznań, Poland

### Table of contents

|                                                                                           | page |
|-------------------------------------------------------------------------------------------|------|
| 1. General data                                                                           | S1   |
| 2. Procedure for digestion of nanocatalysts with EDTA, and nanoparticles capping with PVP | S1   |
| 3. TEM and size distribution of ZIF-8, Au@CN and Pd@CN                                    | S2   |
| 4. TEM and size distribution of Pd@ZIF-8 and Au@ZIF-8 after reaction                      | S3   |
| 5. XRD patterns of ZIF-8, Pd@ZIF-8 and Au@ZIF-8                                           | S4   |
| 6. XPS spectrum of the Pd@ZIF-8 and Au@ZIF-8                                              | S5   |
| 7. XPS spectrum of the Pd@ZIF-8 and Au@ZIF-8 after reaction                               | S5   |
| 8. Physical properties of the nanocatalysts on ZIF-8, Au@ZIF-8 and Pd@ZIF-8               | S6   |
| 9. Nanocatalysts for recycling experiments                                                | S6   |
| 10. <sup>1</sup> H NMR spectra for various substrates with Pd@ZIF-8 as catalyst           | S7   |
| 11. <sup>1</sup> H NMR spectra for various substrates with Au@ZIF-8 as catalyst           | S9   |

## 1. General data

All the solvents and chemicals were used as received.  $^1\text{H}$  NMR spectra were recorded at 25 °C with a Bruker AC 300 MHz. All the chemical shifts are reported in parts per million ( $\delta$ , ppm) with reference to  $\text{Me}_4\text{Si}$  in  $\text{CDCl}_3$ . X-ray diffraction (XRD) patterns were obtained on SmartLab 9KW with  $\text{Cu K}\alpha$  radiation. Nanoparticles loaded into the ZIF-8 were determined by Inductively Coupled Plasma Mass Spectrometry (ICP-MS). Transmission Electron Microscopy (TEM): The sizes of the MNPs were determined by TEM using a JEOL JEM 1400 (120 kV) microscope. The TEM samples were prepared by deposition of the nanoparticle suspension (10  $\mu\text{L}$ ) onto a carbon-coated microscopy copper grid. X-ray Photoelectron Spectroscopy (XPS): System: SPECS SAGE HR; X-Ray source:  $\text{Al K}\alpha$  non-monochromatic; operated at 12.5 kV and 300 W. Take off angle 90°, at  $\sim 10^{-8}$  Torr. Pass energy for survey spectra 30 eV, 10 eV for narrow scans analysis; spectra are calibrated to CC carbon 285 eV. Analysis is consisted of Shirley background subtraction. Peaks are fitted with symmetrical Gaussian-Lorentizan (GL) line shapes. Samples are prepared by dehydration on the titania coated glass or silica substrates. Titania is selected as a substrate to avoid the overlap of Si and Au. Flash column chromatography was performed using silica gel (300-400 mesh).

## 2. Procedure for digestion of nanocatalysts with EDTA, and nanoparticles capping with PVP for TEM characterization.

A schlenk flask is charged with 20 mg of as-prepared  $\text{Pd@ZIF-8}$  in 6 mL water, and this mixture is stirred continuously at room temperature. PVP ( $M_w=10000$ , 10 equiv per NPs) solubilized in 2 mL water is added and allowed to stir for 30 min.  $\text{EDTA-2Na}\cdot 2\text{H}_2\text{O}$  (10 equiv) in 2 mL water is then added and the mixture is stirring for 1 h. Several drops of this solution are used for TEM characterization.

### 3. TEM and size distribution of ZIF-8, Au@CN and Pd@CN.

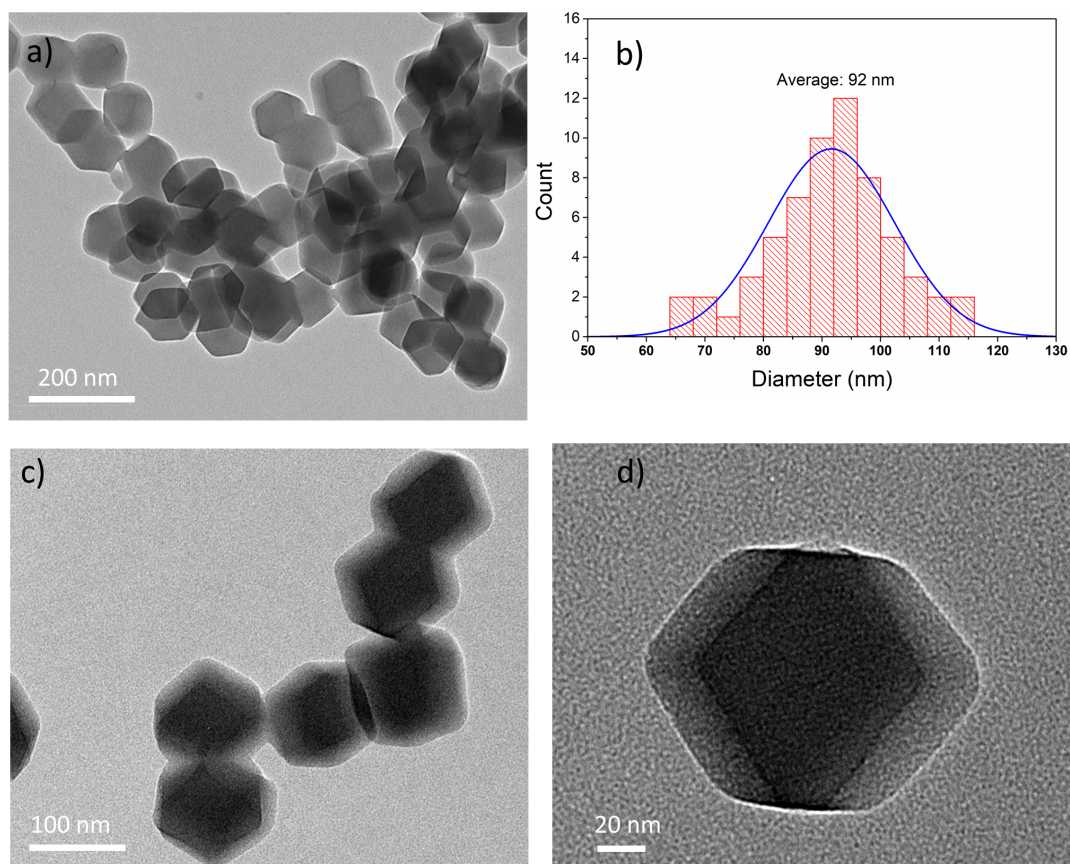

**Fig. S1.** TEM images and size distribution histogram of the ZIF-8.

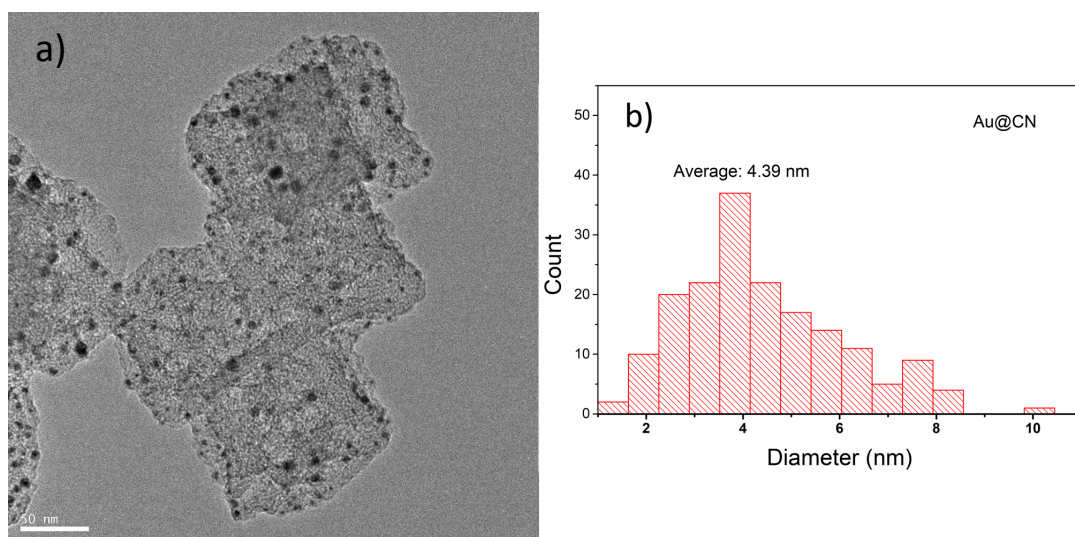

**Fig. S2** TEM images and size distribution histogram of as-synthesized Au@CN.

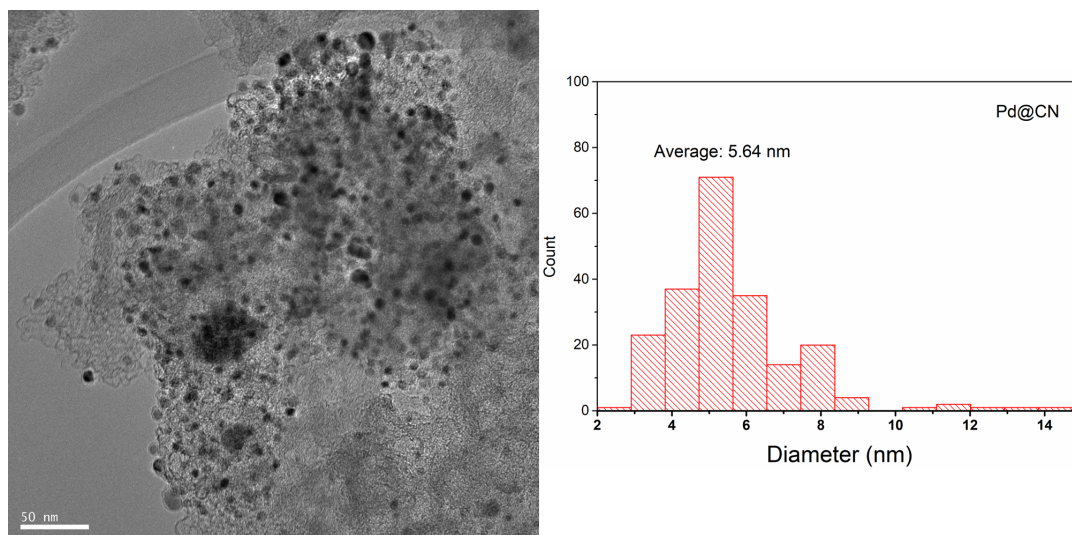

**Fig. S3** TEM images and size distribution histogram of as-synthesized Pd@CN.

#### 4. TEM and size distribution of Pd@ ZIF-8 and Au@ZIF-8 after reaction.

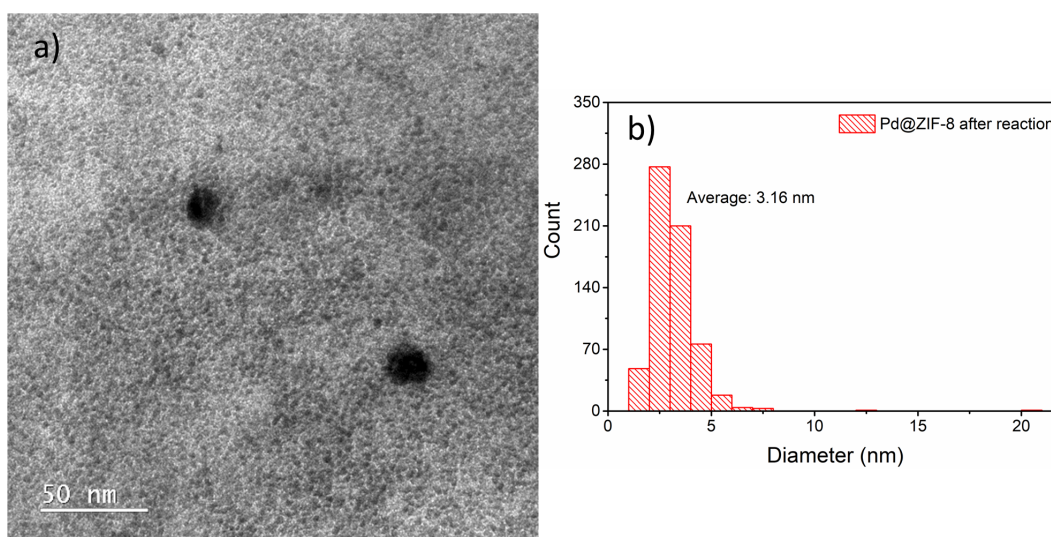

**Fig. S4** TEM image (a) and size distribution (b) of Pd@ZIF-8 after reaction. Pd@ZIF-8 after digestion of the nanocatalyst with ethylenediamine tetracetic acid (EDTA) to release nanoparticles, and nanoparticles stabilized by PVP.

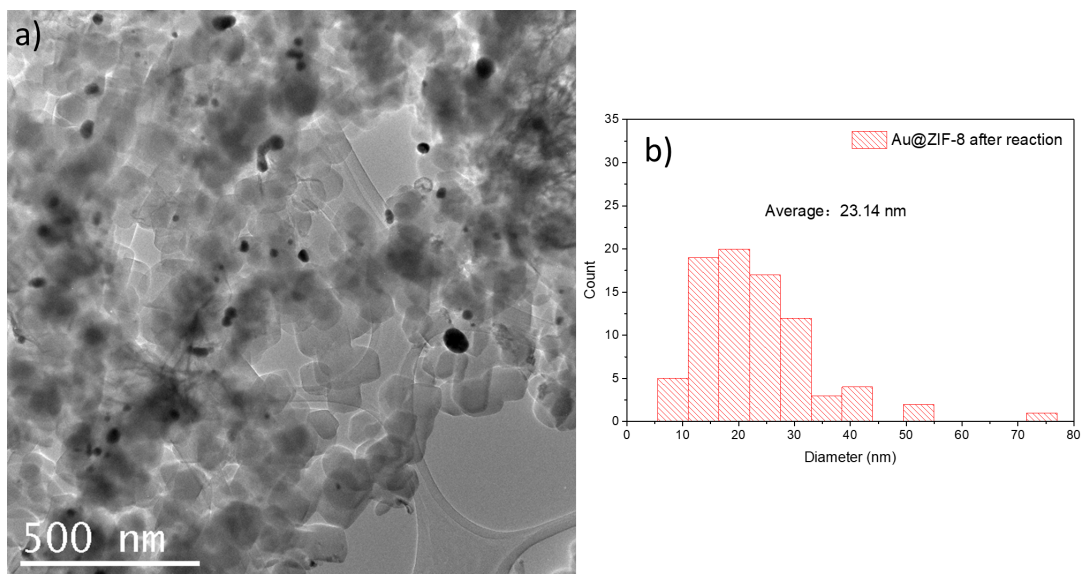

**Fig. S5** TEM images and size distribution histogram of as-synthesized Au@ZIF-8 after reaction.

## 5. XRD patterns of ZIF-8, Pd@ZIF-8 and Au@ZIF-8

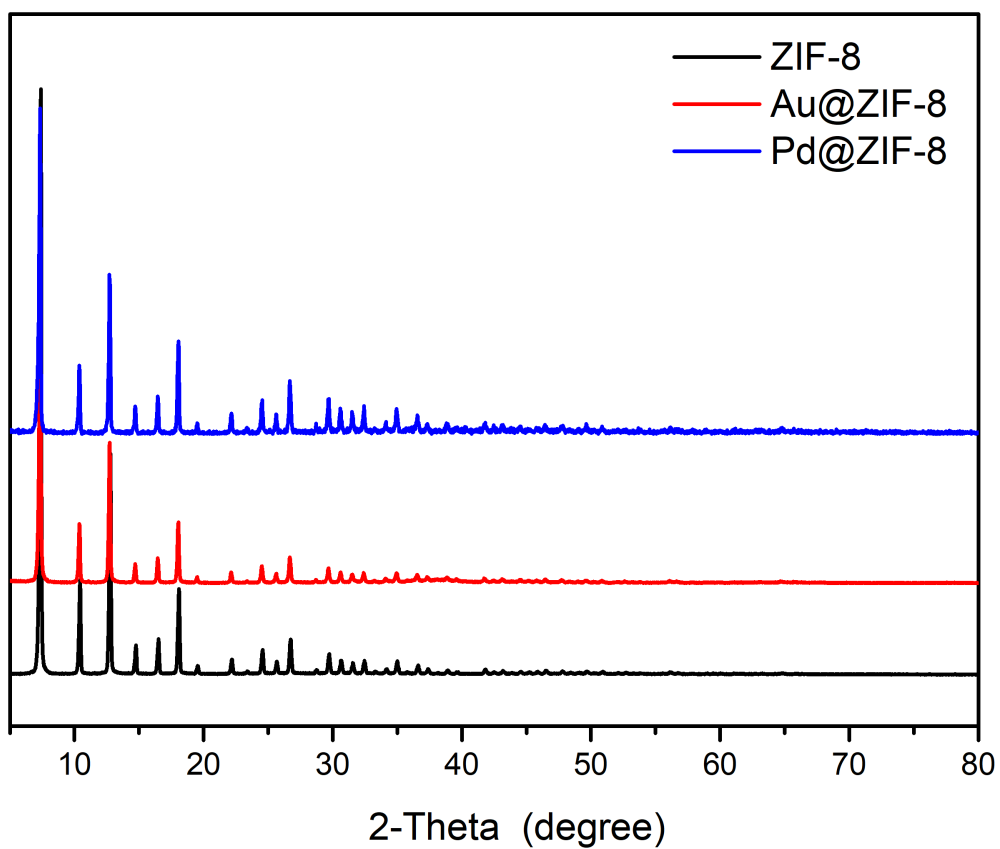

**Fig. S6.** XRD patterns of ZIF-8, Au@ZIF-8 and Pd@ZIF-8.

## 6. XPS spectrum of the Pd@ZIF-8 and Au@ZIF-8

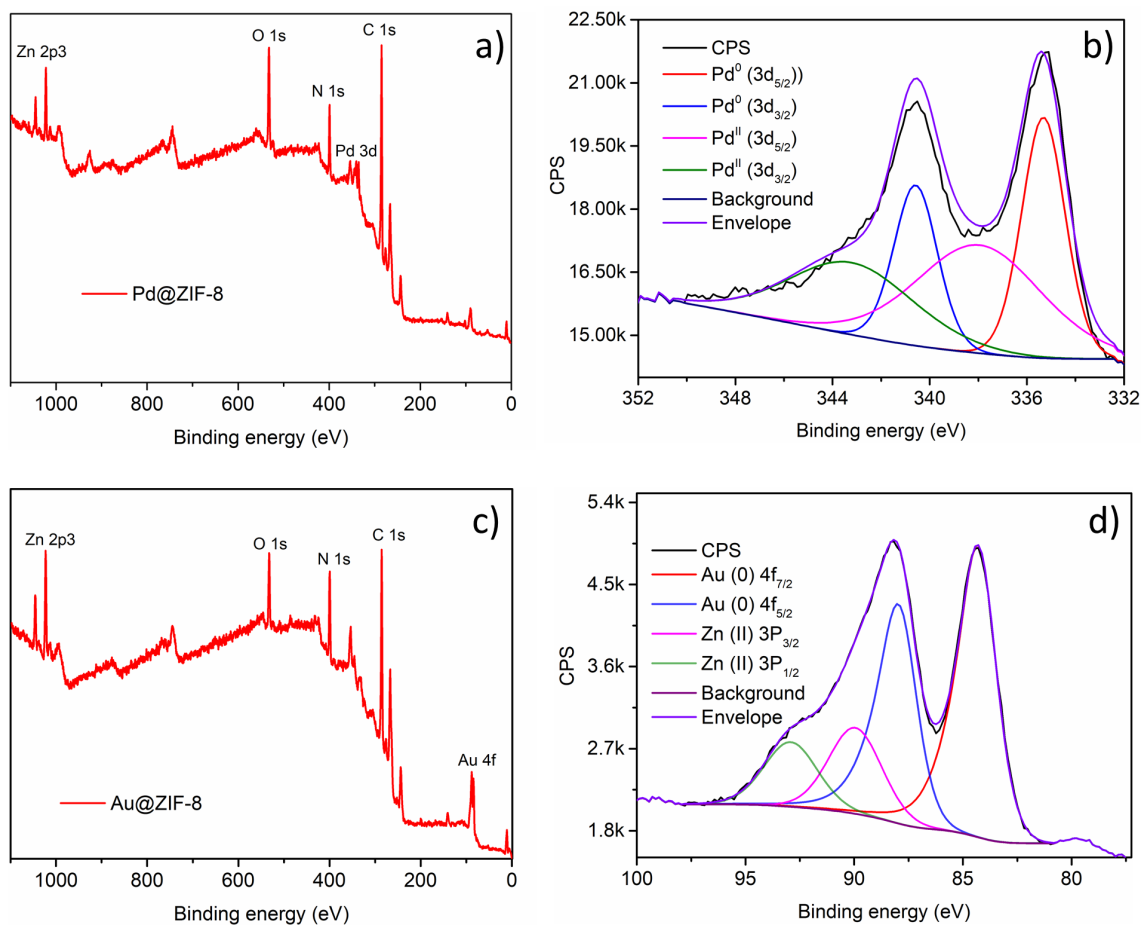

Fig. S7. XPS spectrum of the Pd@ZIF-8(a, b) and Au@ZIF-8 (c, d).

## 7. XPS spectrum of the Pd@ZIF-8 and Au@ZIF-8 after reaction

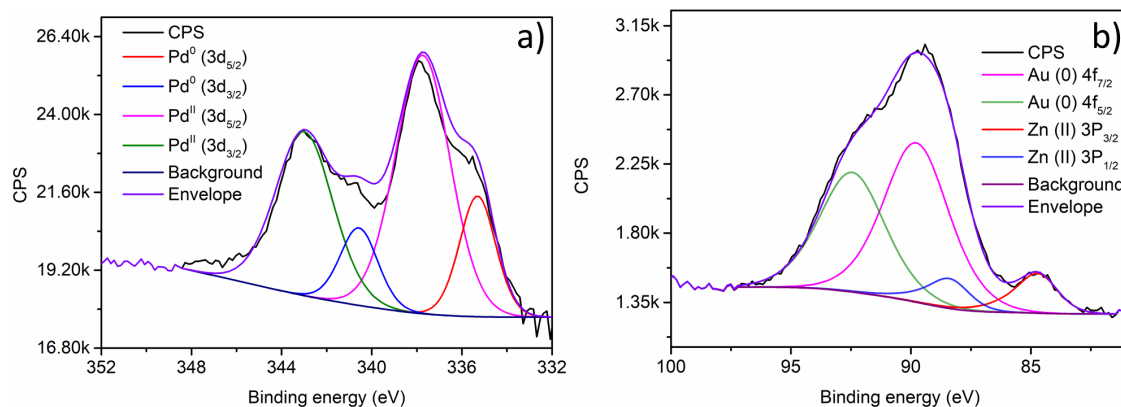

Fig. S8. XPS spectrum of the Pd@ZIF-8(a) and Au@ZIF-8 (b) after the catalytic reaction.

## 8. Physical properties of the nanocatalysts on ZIF-8, Au@ZIF-8 and Pd@ZIF-8

**Table S1.** Physical Properties of the Nanocatalysts on ZIF-8, Pd@ZIF-8 and Au@ZIF-8.

| Sample   | Surface area<br>[m <sup>2</sup> .g <sup>-1</sup> ] | Total Pore<br>volume<br>[cm <sup>3</sup> .g <sup>-1</sup> ] | micropore<br>volume<br>[cm <sup>3</sup> .g <sup>-1</sup> ] | Pore<br>diameter<br>[nm] |
|----------|----------------------------------------------------|-------------------------------------------------------------|------------------------------------------------------------|--------------------------|
| ZIF-8    | 1365.1                                             | 0.81                                                        | 0.651                                                      | 2.38                     |
| Au@ZIF-8 | 1283.1                                             | 0.85                                                        | 0.595                                                      | 2.64                     |
| Pd@ZIF-8 | 1247.7                                             | 0.66                                                        | 0.581                                                      | 2.07                     |

## 9. Nanocatalysts for recycling experiments

### Procedure for recycling the nanoparticle catalyts:

After the reaction, the system was allowed to cool to r.t.. The catalyst was washed with CH<sub>2</sub>Cl<sub>2</sub>, and with water by centrifugation respectively to remove iodobenzene and K<sub>3</sub>PO<sub>4</sub>, then dried at 60 °C under vacuum. After charging another run of substrates, DMF and K<sub>3</sub>PO<sub>4</sub>, the system was purged with N<sub>2</sub> for 10 minutes. The reaction was then allowed to be proceeding. After 48 h, the reaction mixture was filtered. The liquid was extracted several times with CH<sub>2</sub>Cl<sub>2</sub> and H<sub>2</sub>O. The organic phase was dried over Na<sub>2</sub>SO<sub>4</sub>. Then CH<sub>2</sub>Cl<sub>2</sub> was removed under reduced pressure at the rotary evaporator providing the crude product. <sup>1</sup>H NMR (300 MHz, CDCl<sub>3</sub>) was used to calculate the conversion.

**Table S2.** Effects of solvent, base and temperature on the homocoupling of iodobenzene catalyzed by Au@ZIF-8.

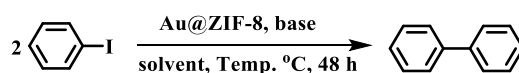

| Entry | Solvent | Base                           | Temp.<br>(°C) | Conversion (%) <sup>a</sup> |
|-------|---------|--------------------------------|---------------|-----------------------------|
| 1     | DMF     | K <sub>2</sub> CO <sub>3</sub> | 130           | 62                          |
| 2     | DMF     | K <sub>2</sub> CO <sub>3</sub> | 110           | 28                          |
| 3     | DMF     | K <sub>2</sub> CO <sub>3</sub> | 140           | 75                          |
| 4     | Xylene  | K <sub>2</sub> CO <sub>3</sub> | 140           | 11                          |
| 5     | PEG-400 | K <sub>2</sub> CO <sub>3</sub> | 140           | 74                          |
| 6     | DMF     | K <sub>3</sub> PO <sub>4</sub> | 140           | 83                          |

Reaction conditions: 0.2 mmol iodobenzene, 0.6 mmol base, 1 mL solvent, 50 mg Au@ZIF-8 (6 mmol%), 140 °C, N<sub>2</sub>, 48 h. <sup>a</sup> <sup>1</sup>H NMR conversion.

## 10. $^1\text{H}$ NMR spectra of various substrates with Pd@ZIF-8 as catalyst

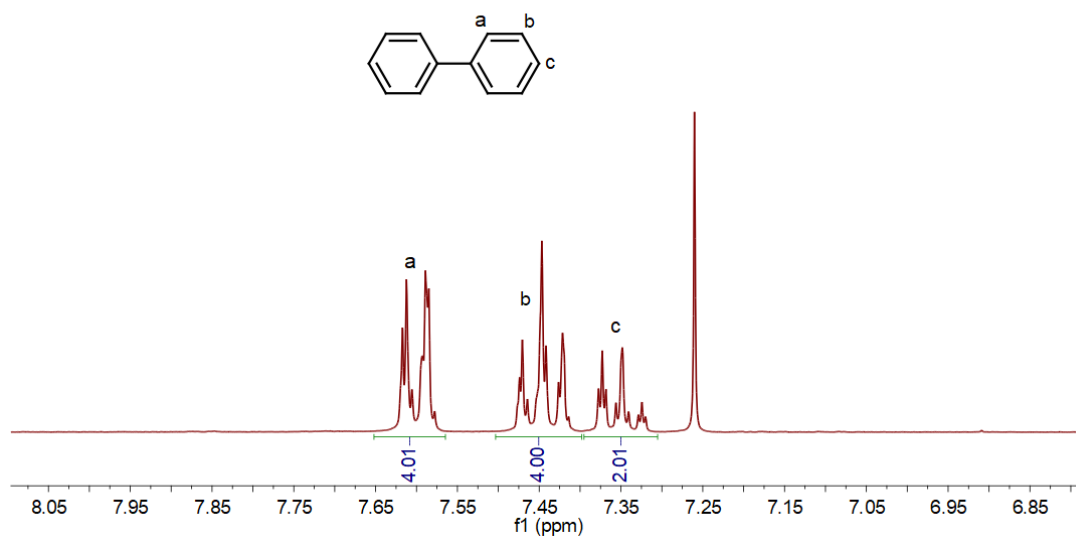

Fig. S9.  $^1\text{H}$  NMR (300 MHz,  $\text{CDCl}_3$ ) spectrum of the product of 1,1'-biphenyl (homocoupling of iodobenzene with Pd@ZIF-8).

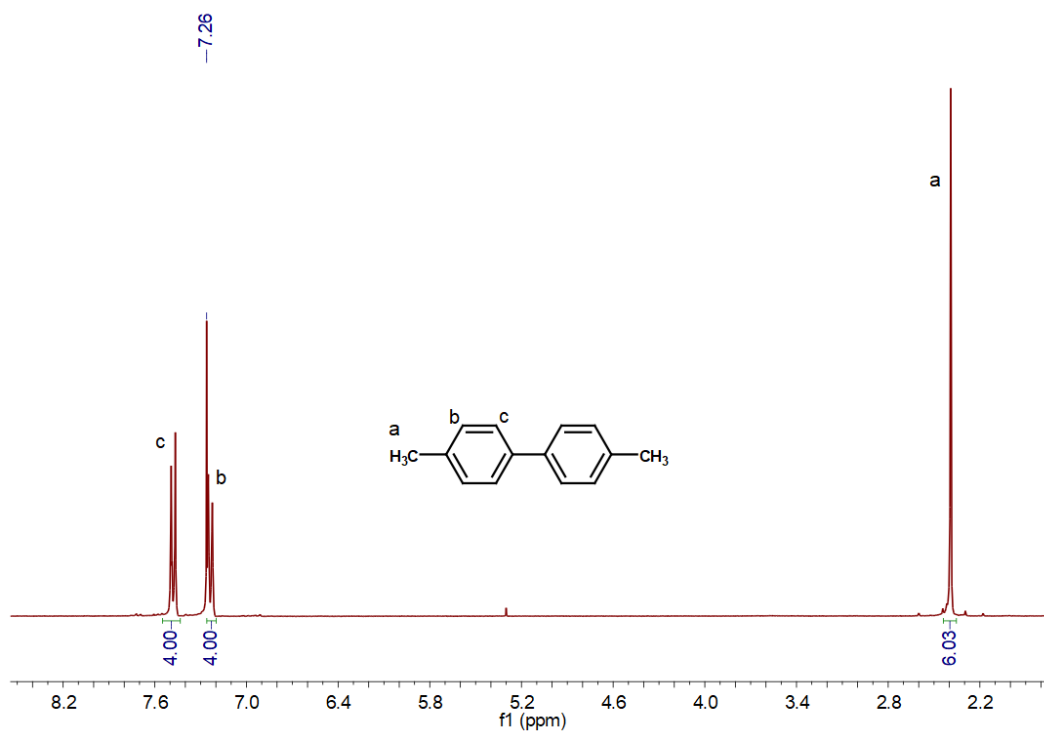

Fig. S10.  $^1\text{H}$  NMR (300 MHz,  $\text{CDCl}_3$ ) spectrum of the product of 4,4'-dimethyl-1,1'-biphenyl (Homocoupling of iodotoluene with Pd@ZIF-8).



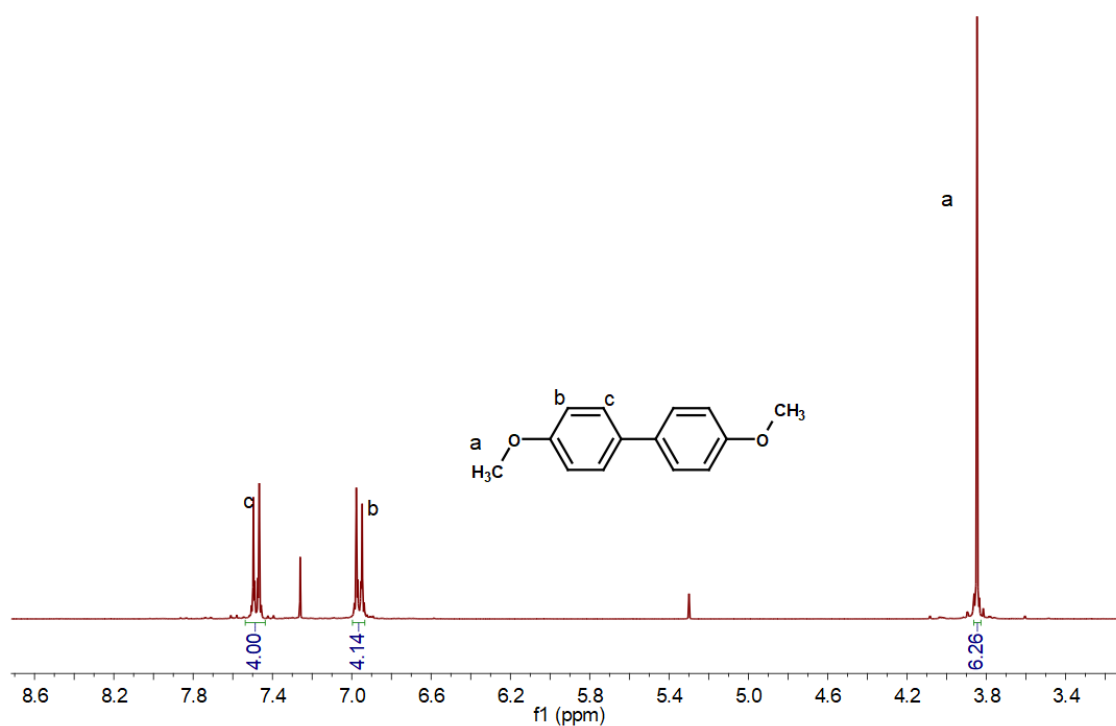

**Fig. S11.**  $^1\text{H}$  NMR (300 MHz,  $\text{CDCl}_3$ ) spectrum of the product of 4,4'-dimethoxy-1,1'-biphenyl (homocoupling of iodoanisole with  $\text{Pd@ZIF-8}$ ).

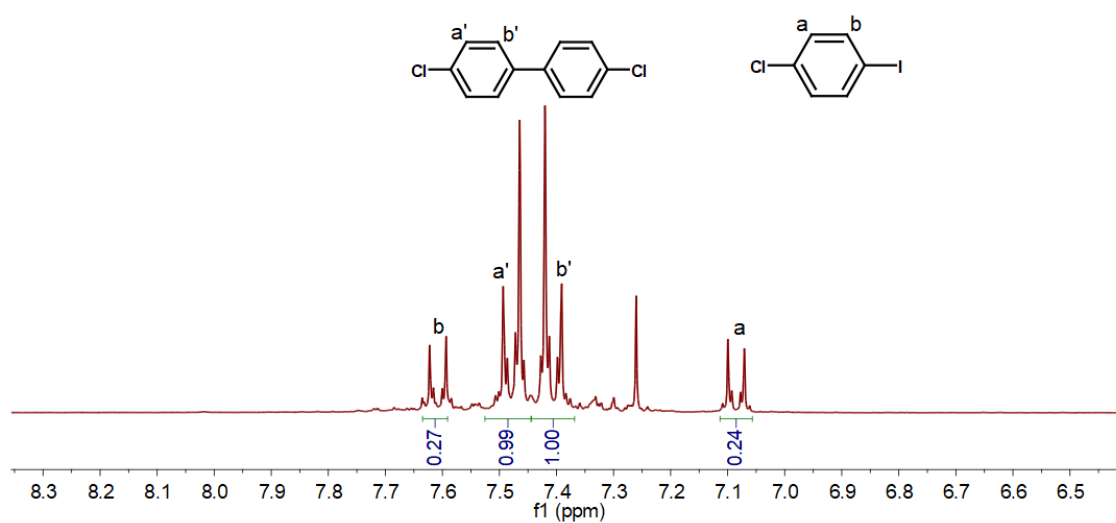

**Fig. S12.**  $^1\text{H}$  NMR (300 MHz,  $\text{CDCl}_3$ ) spectrum of the crude product of 4,4'-dichloro-1,1'-biphenyl (Homocoupling of 1-chloro-4-iodobenzene with  $\text{Pd@ZIF-8}$ ).

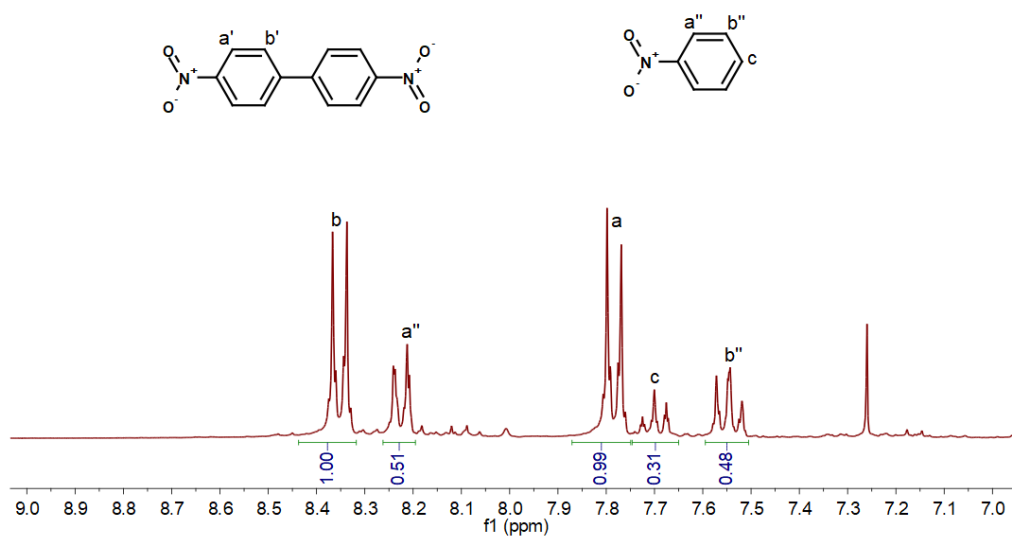

**Fig. S13.**  $^1\text{H}$  NMR (300 MHz,  $\text{CDCl}_3$ ) Spectrum of the crude product of 4,4'-dinitro-1,1'-biphenyl (Homocoupling of 1-iodo-4-nitrobenzene with  $\text{Pd@ZIF-8}$ ).

## 11. $^1\text{H}$ NMR spectra for various substrates with $\text{Au@ZIF-8}$ as catalyst

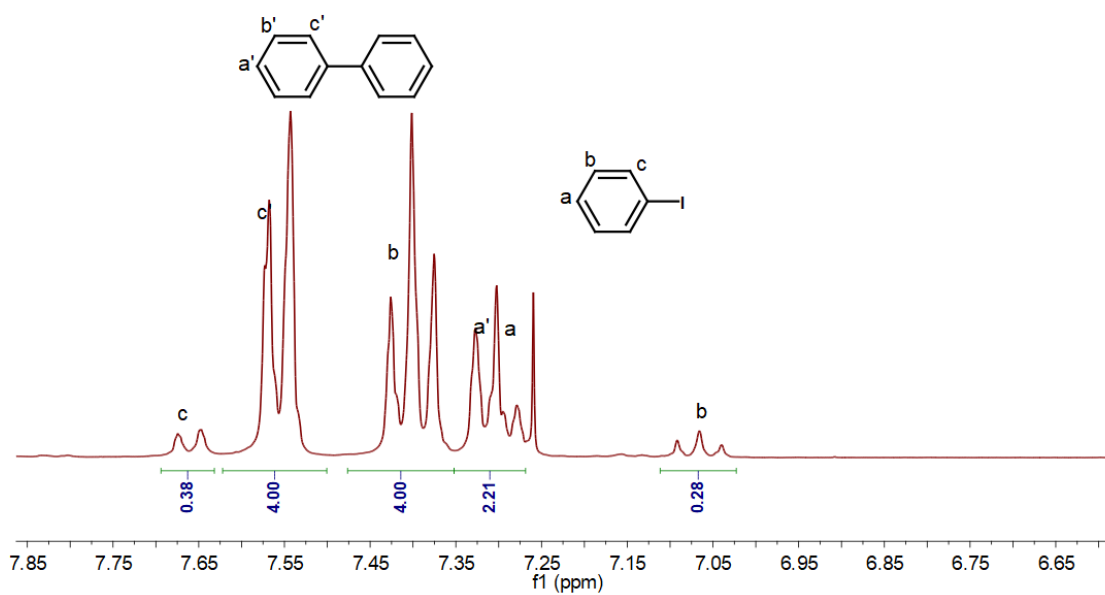

**Fig. S14.**  $^1\text{H}$  NMR (300 MHz,  $\text{CDCl}_3$ ) Spectrum of the crude product of 1,1'-biphenyl (homocoupling of iodobenzene with  $\text{Au@ZIF-8}$ ).

-7.26

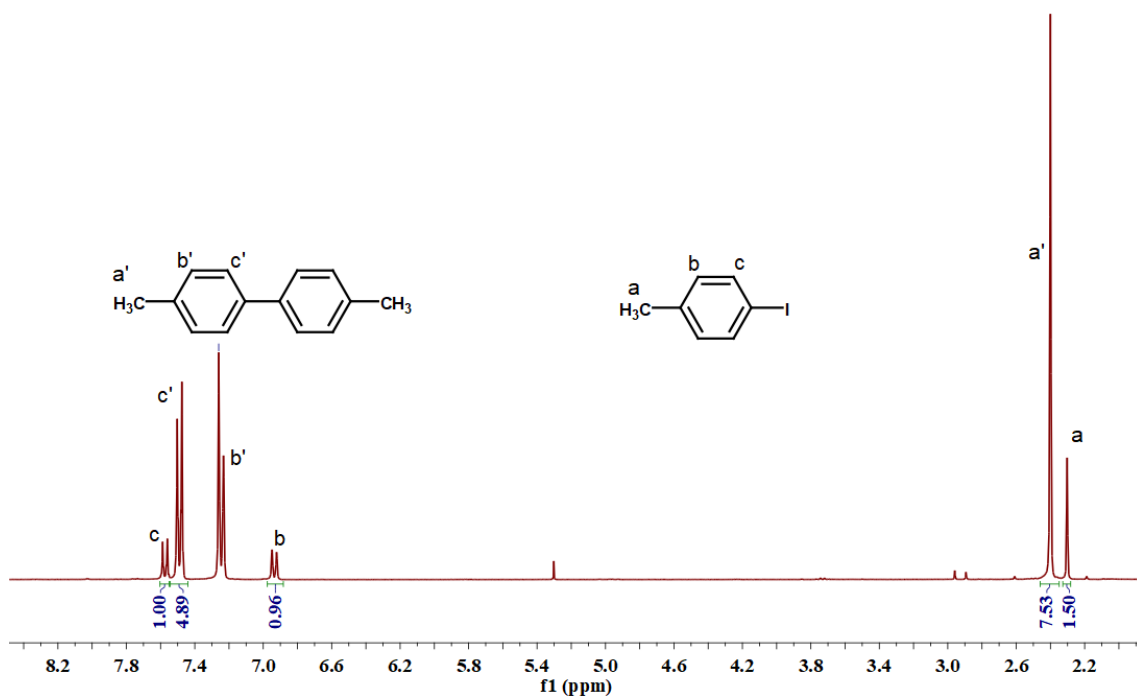

Fig. S15. <sup>1</sup>H NMR (300 MHz, CDCl<sub>3</sub>) Spectrum of the crude product of 4,4'-dimethyl-1,1'-biphenyl (Homocoupling of iodotoluene with Au@ZIF-8).

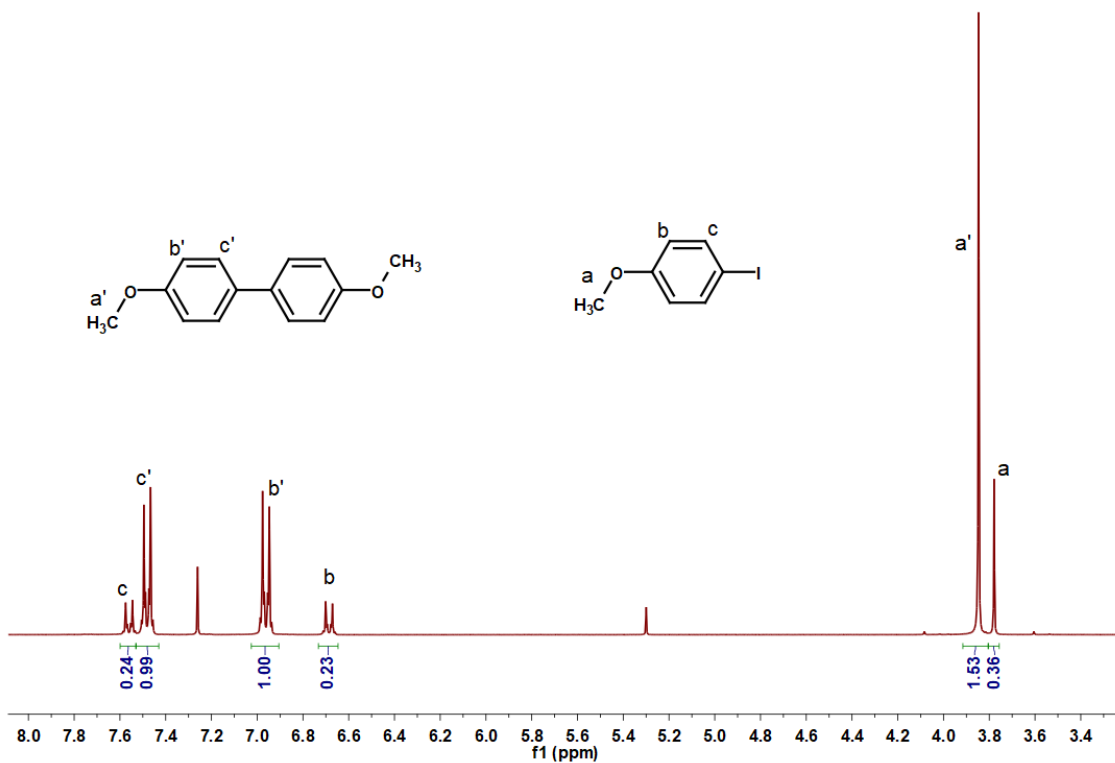

Fig. S16 <sup>1</sup>H NMR (300 MHz, CDCl<sub>3</sub>) Spectrum of the crude product of 4,4'-dimethoxy-1,1'-biphenyl (Homocoupling of iodoanisole with Au@ZIF-8).

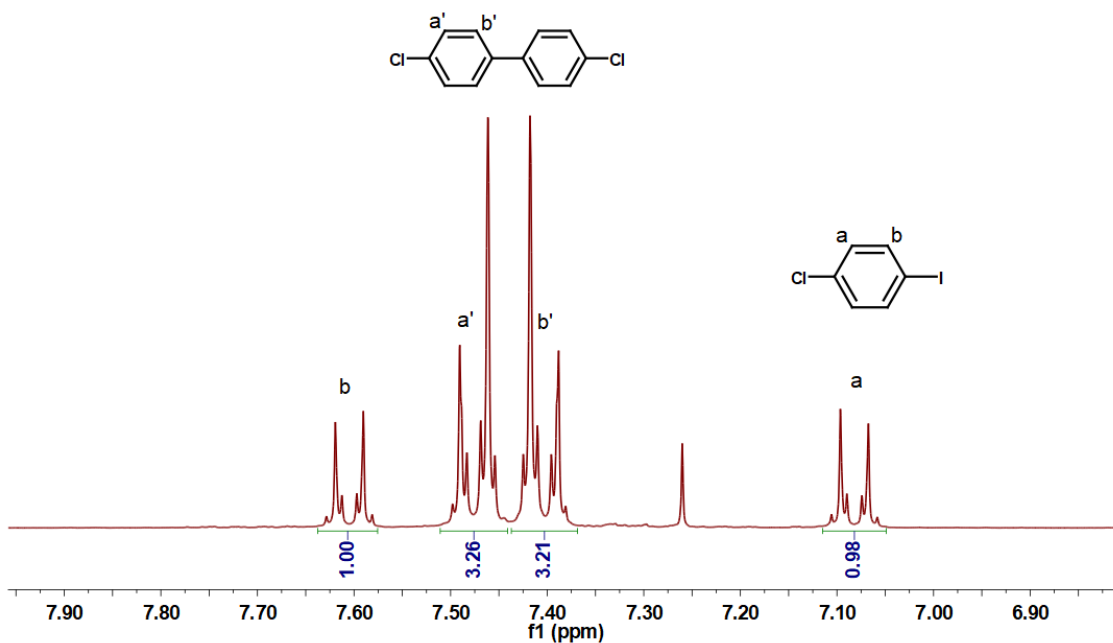

**Fig. S17.** <sup>1</sup>H NMR (300 MHz, CDCl<sub>3</sub>) spectrum of the crude product of 4,4'-dichloro-1,1'-biphenyl (Homocoupling of 1-chloro-4-iodobenzene with Au@ZIF-8).

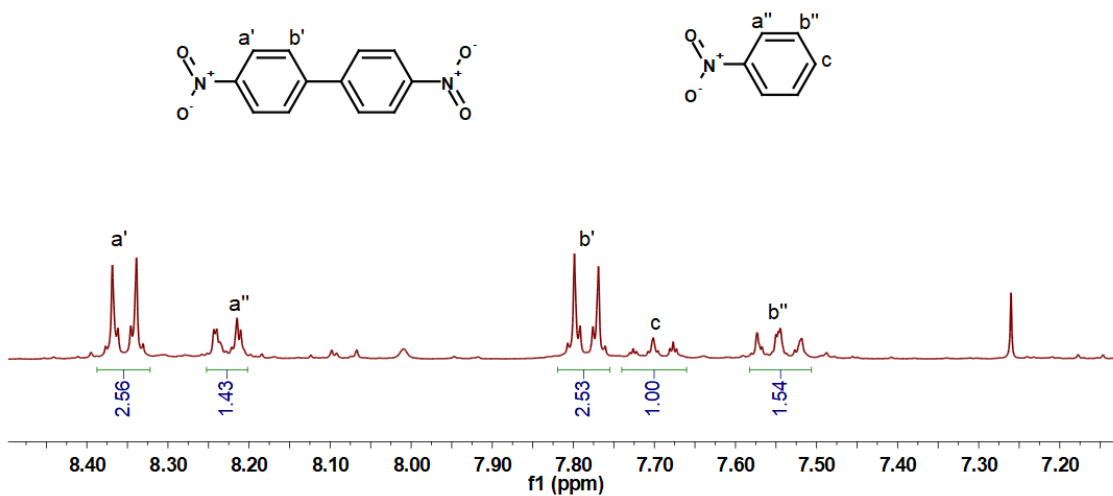

**Fig. S18.** <sup>1</sup>H NMR (300 MHz, CDCl<sub>3</sub>) spectrum of the crude product of 4,4'-dinitro-1,1'-biphenyl (Homocoupling of 1-iodo-4-nitrobenzene with Au@ZIF-8).
